# Supplementary material for: Computational study of OH, NH 2 -functionalized iron-doped tetraphenylporphyrin as a photocatalyst for CO 2 reduction to C 1 fuels
Source: Royal Society of Chemistry journal article supplement (doi:10.1039/d5se01431j), 2025-12-22
Supplement: d5se01431j1.pdf [file d5se01431j1.pdf]

## Supplementary Information

### Computational Study of OH, NH<sub>2</sub>-Functionalized Iron-Doped Tetraphenylporphyrin as a Photocatalyst for CO<sub>2</sub> Reduction to C<sub>1</sub> Fuels

Thangaraj Thiruppathiraja,<sup>1</sup> Basheer Azaad,<sup>2</sup> Angappan Mano Priya<sup>3\*</sup>

<sup>1</sup>Institute for Energy Research, School of Chemistry and Chemical Engineering, Jiangsu University, Zhenjiang 212013, People's Republic of China.

<sup>2</sup>Department of Physics, Saveetha Engineering College, Thandalam, Chennai 602105, Tamil Nadu, India.

<sup>3</sup>IPR (Institut de Physique de Rennes) —UMR 6251, Université de Rennes, CNRS, F-35000 Rennes, France.

**\*Corresponding Author Email:** [manoophys@gmail.com](mailto:manoophys@gmail.com),  
[mano-priya.angappan@univ-rennes.fr](mailto:mano-priya.angappan@univ-rennes.fr)



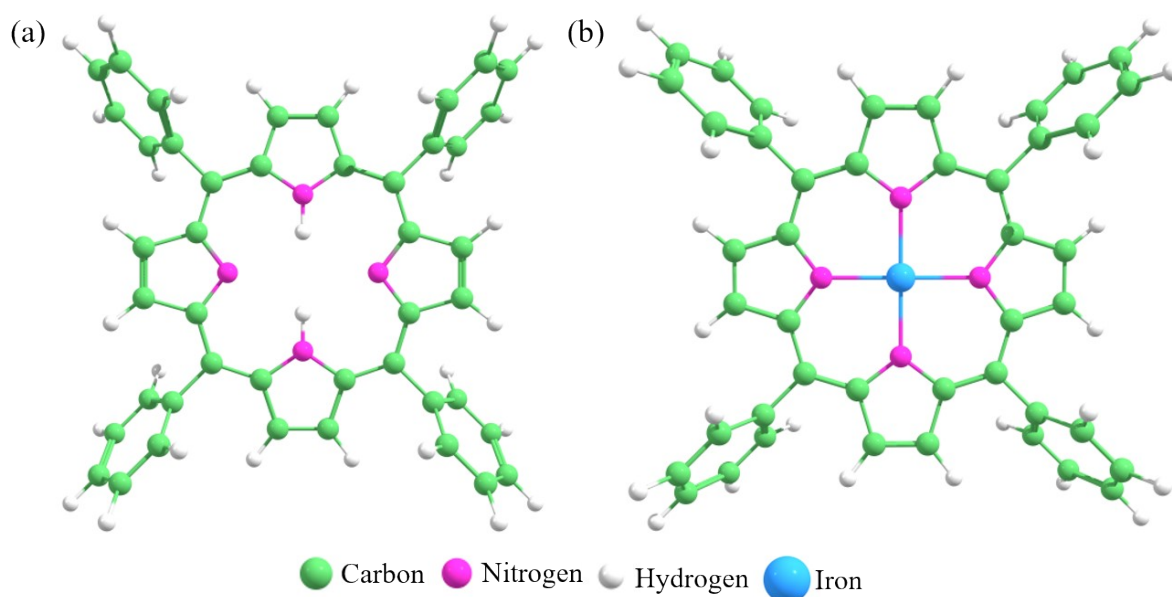

**Fig. S1.** Optimized geometries of (a) Tetraphenylporphyrin (TPP) and (b) iron-doped tetraphenylporphyrin (Fe-TPP) surfaces. The structures illustrate the atomic arrangements and coordination environments after full geometry optimization. These optimized configurations serve as the basis for analyzing their structural stability, electronic properties, and catalytic reactivity.

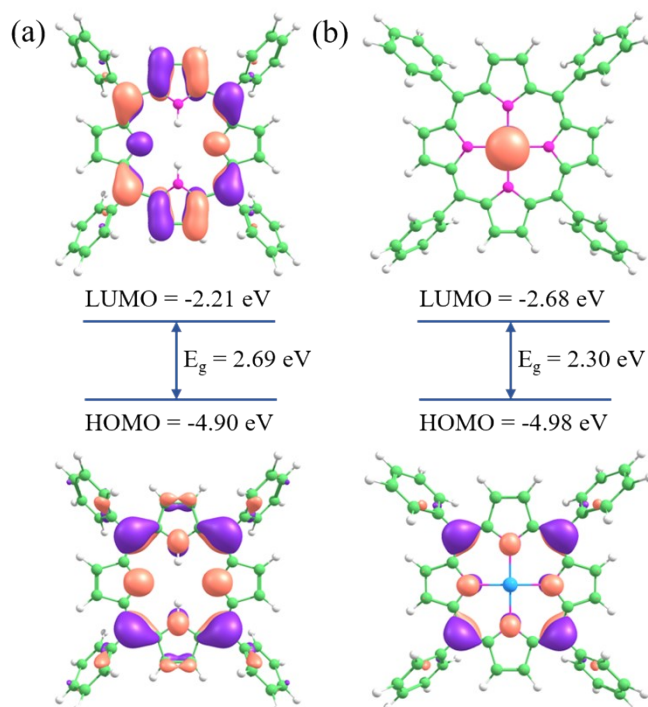

**Fig. S2.** HOMO-LUMO plots of (a) TPP and (b) Fe-TPP surfaces. The violet and orange regions represent the negative and positive lobes of the molecular orbitals, respectively, illustrating the spatial distribution of electron density in the frontier orbitals.



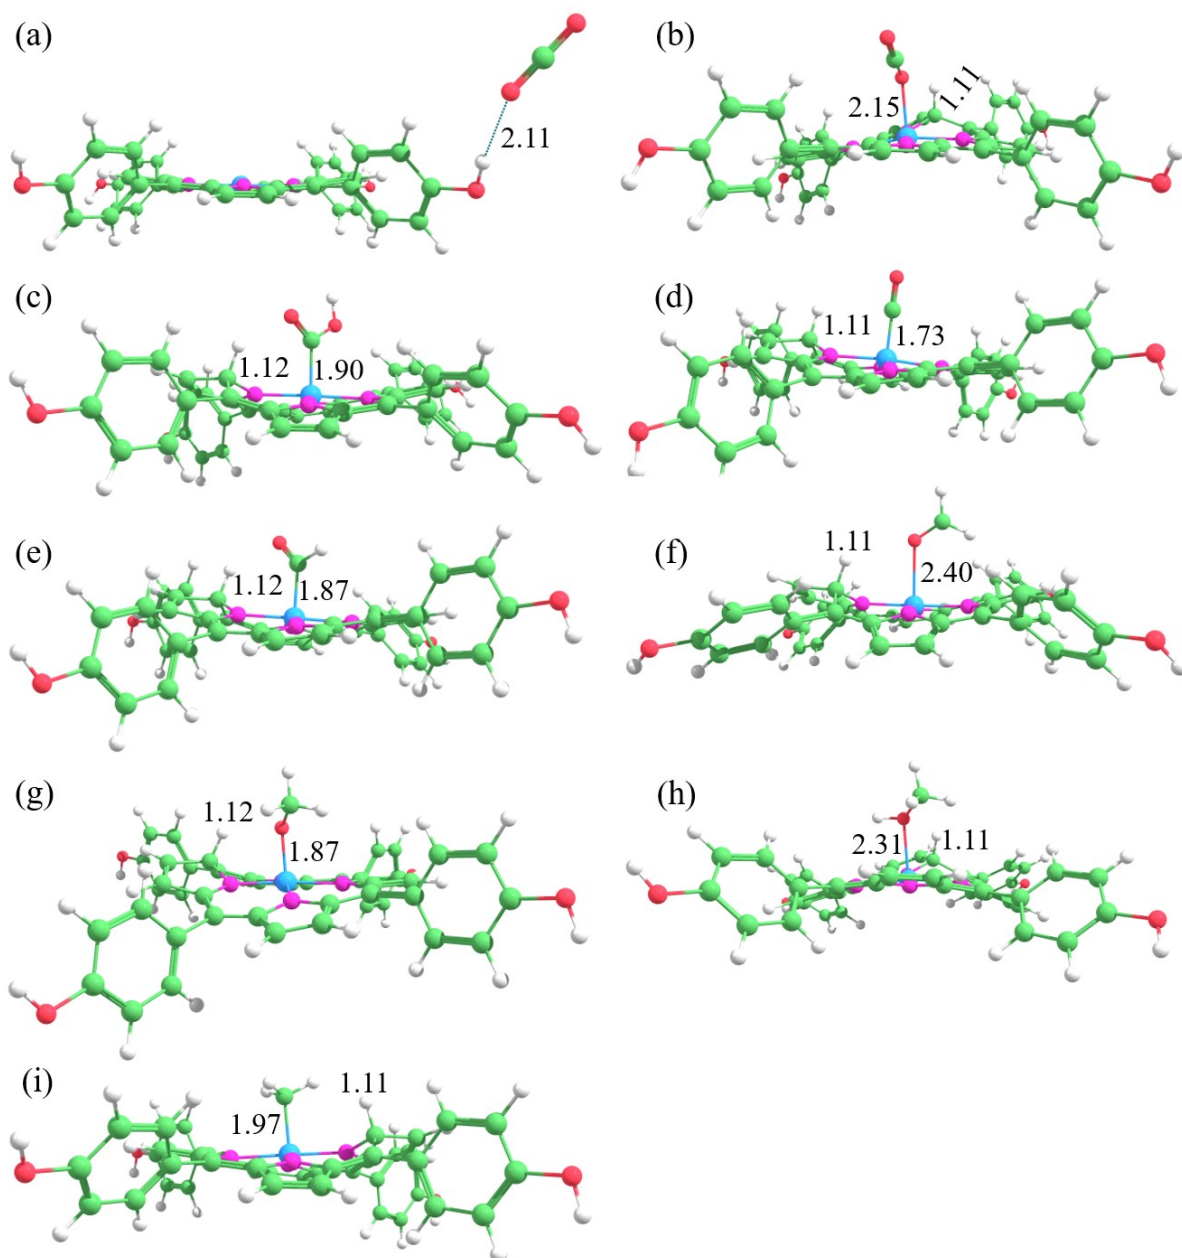

**Fig. S3.** The optimized geometries of reactants ( $\text{CO}_2$  reduction to  $\text{C}_1$  products): (a)  $\text{*+CO}_2$ , (b)  $\text{*CO}_2\text{+H}$ , (c)  $\text{*COOH+H}$ , (d)  $\text{*CO+H}$ , (e)  $\text{*CHO+H}$ , (f)  $\text{*OCH}_2\text{+H}$ , (g)  $\text{*OCH}_3\text{+H}$ , (h)  $\text{*CH}_3\text{OH+H}$ , and (i)  $\text{*CH}_3\text{+H}$ . The \* indicates the adsorbed on the Fe-OHTPP surface. The unit of bond lengths are indicated in Å. The green, red, pink, white, and blue represents the carbon, oxygen, nitrogen, hydrogen atoms, and iron transition metal.



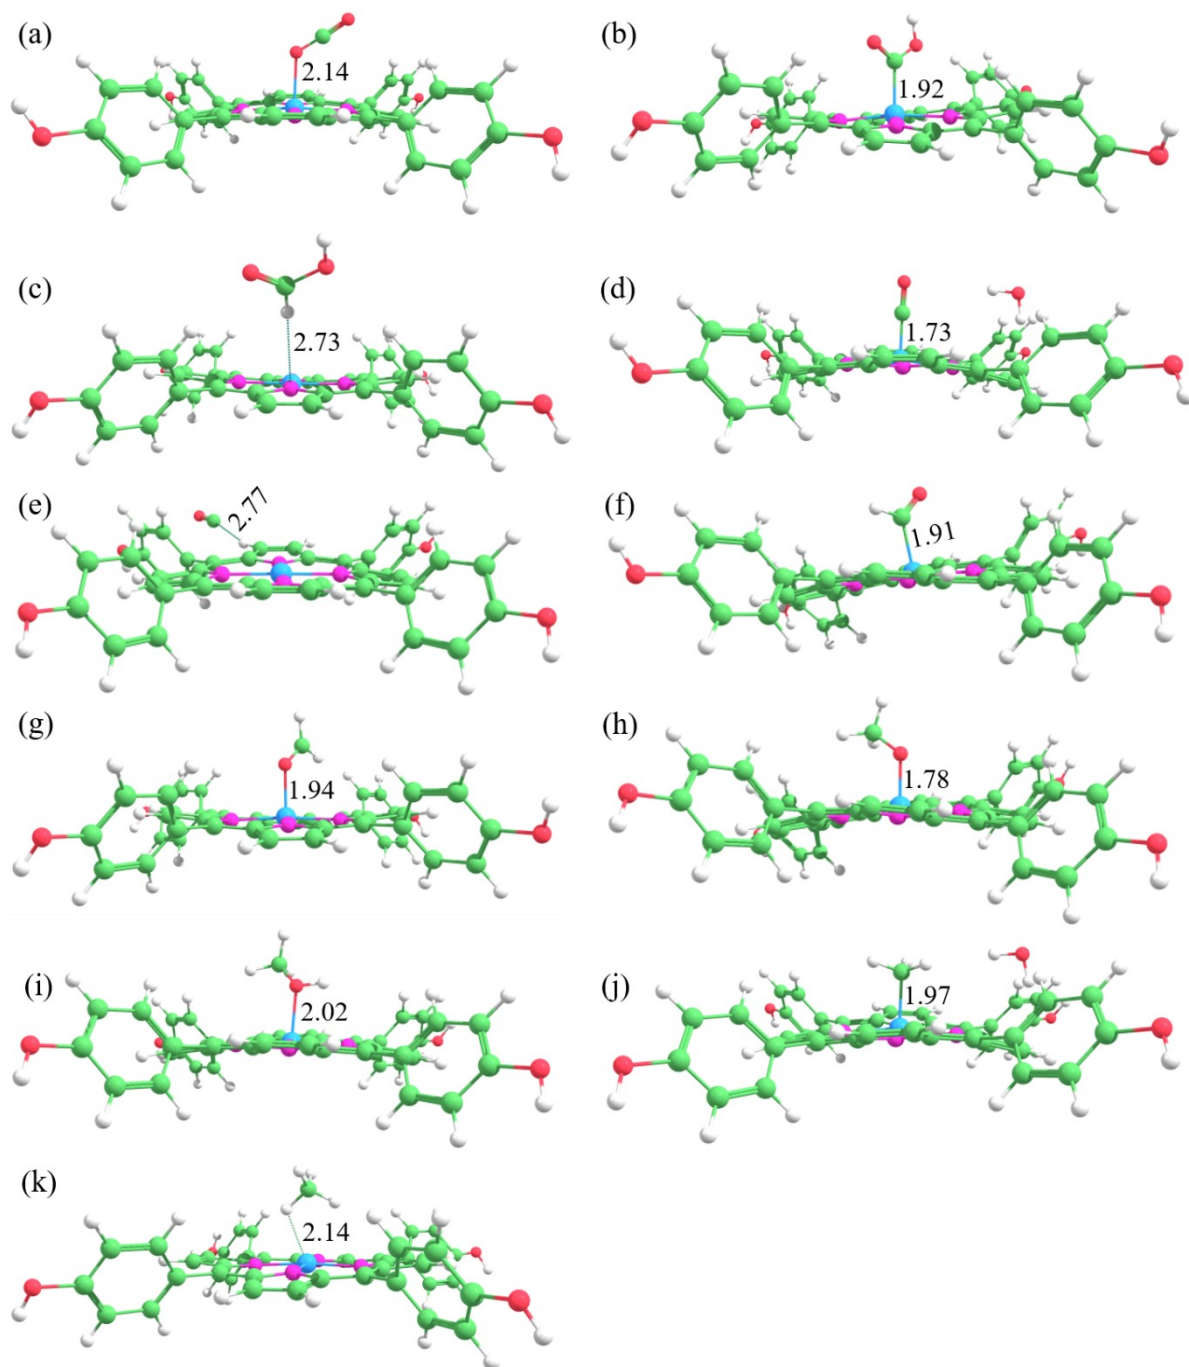

**Fig. S4.** The optimized geometries of products ( $\text{CO}_2$  reduction to  $\text{C}_1$  products): (a)  $\text{*CO}_2$ , (b)  $\text{*COOH}$ , (c)  $\text{*+HCOOH}$ , (d)  $\text{*CO+H}_2\text{O}$ , (e)  $\text{*+CO}$ , (f)  $\text{*CHO}$ , (g)  $\text{*OCH}_2$ , (h)  $\text{*OCH}_3$  (i)  $\text{*CH}_3\text{OH}$ , (j)  $\text{*CH}_3+\text{H}_2\text{O}$ , and (k)  $\text{*+CH}_4$ . The \* indicates the adsorbed on the Fe-OHTPP surface. The unit of bond lengths are indicated in Å. The green, red, pink, white, and blue represents the carbon, oxygen, nitrogen, hydrogen atoms, and iron transition metal.



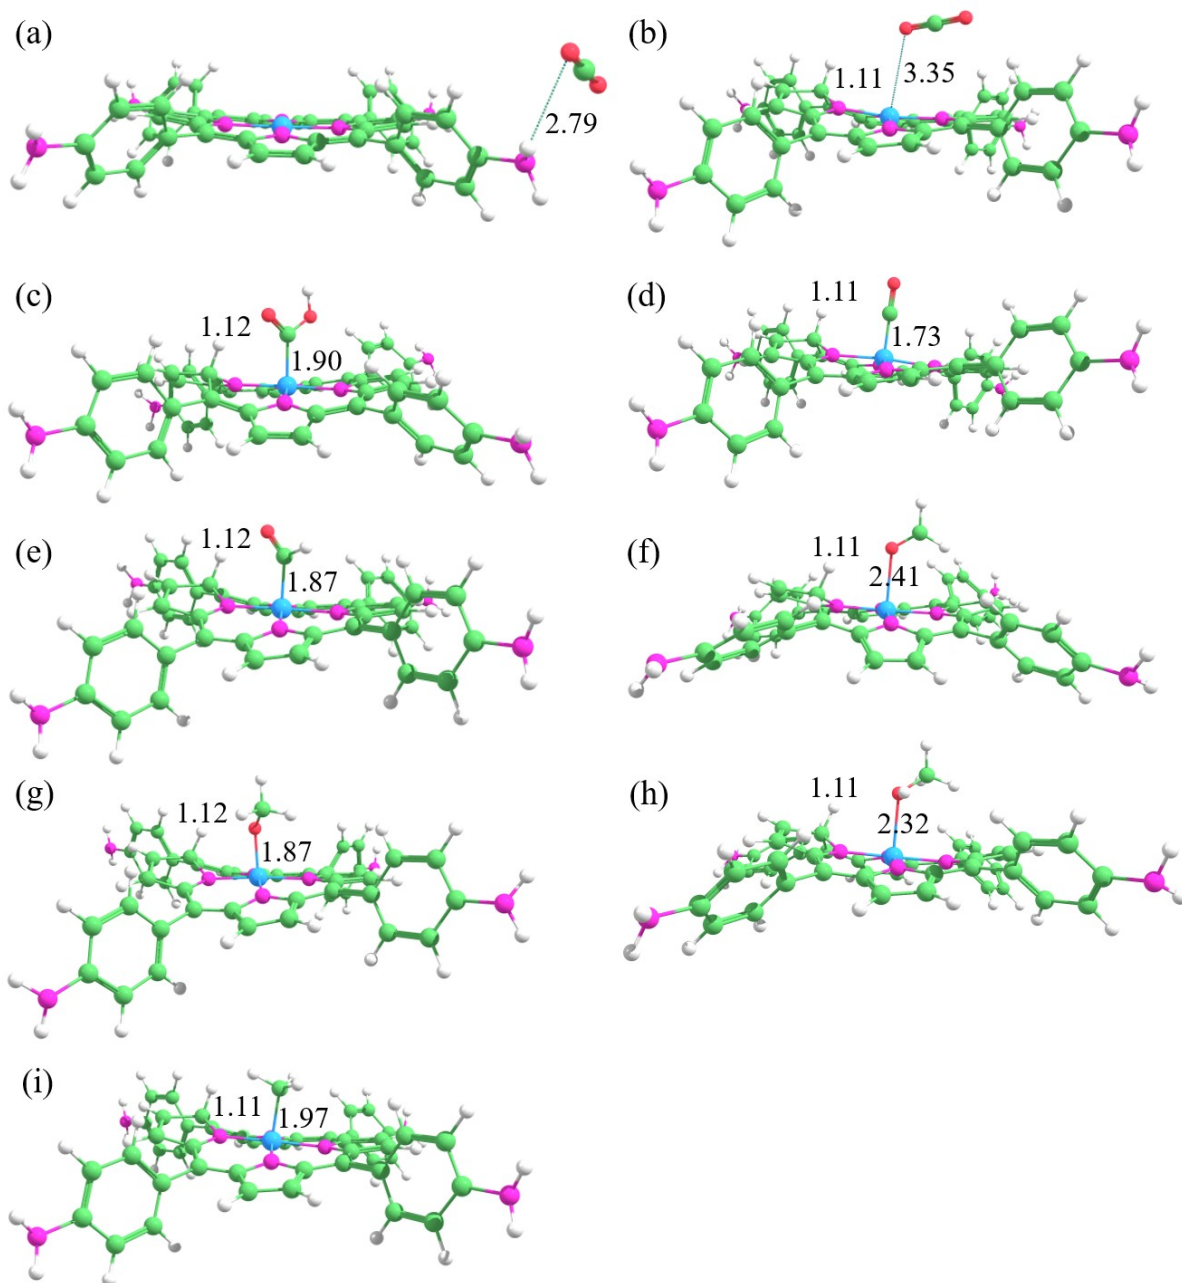

**Fig. S5.** The optimized geometries of reactants ( $\text{CO}_2$  reduction to  $\text{C}_1$  products): (a)  $\text{*+CO}_2$ , (b)  $\text{*CO}_2\text{+H}$ , (c)  $\text{*COOH+H}$ , (d)  $\text{*CO+H}$ , (e)  $\text{*CHO+H}$ , (f)  $\text{*OCH}_2\text{+H}$ , (g)  $\text{*OCH}_3\text{+H}$ , (h)  $\text{*CH}_3\text{OH+H}$ , and (i)  $\text{*CH}_3\text{+H}$ . The \* indicates the adsorbed on the Fe-NH<sub>2</sub>TPP surface. The unit of bond lengths are indicated in Å. The green, red, pink, white, and blue represents the carbon, oxygen, nitrogen, hydrogen atoms, and iron transition metal.



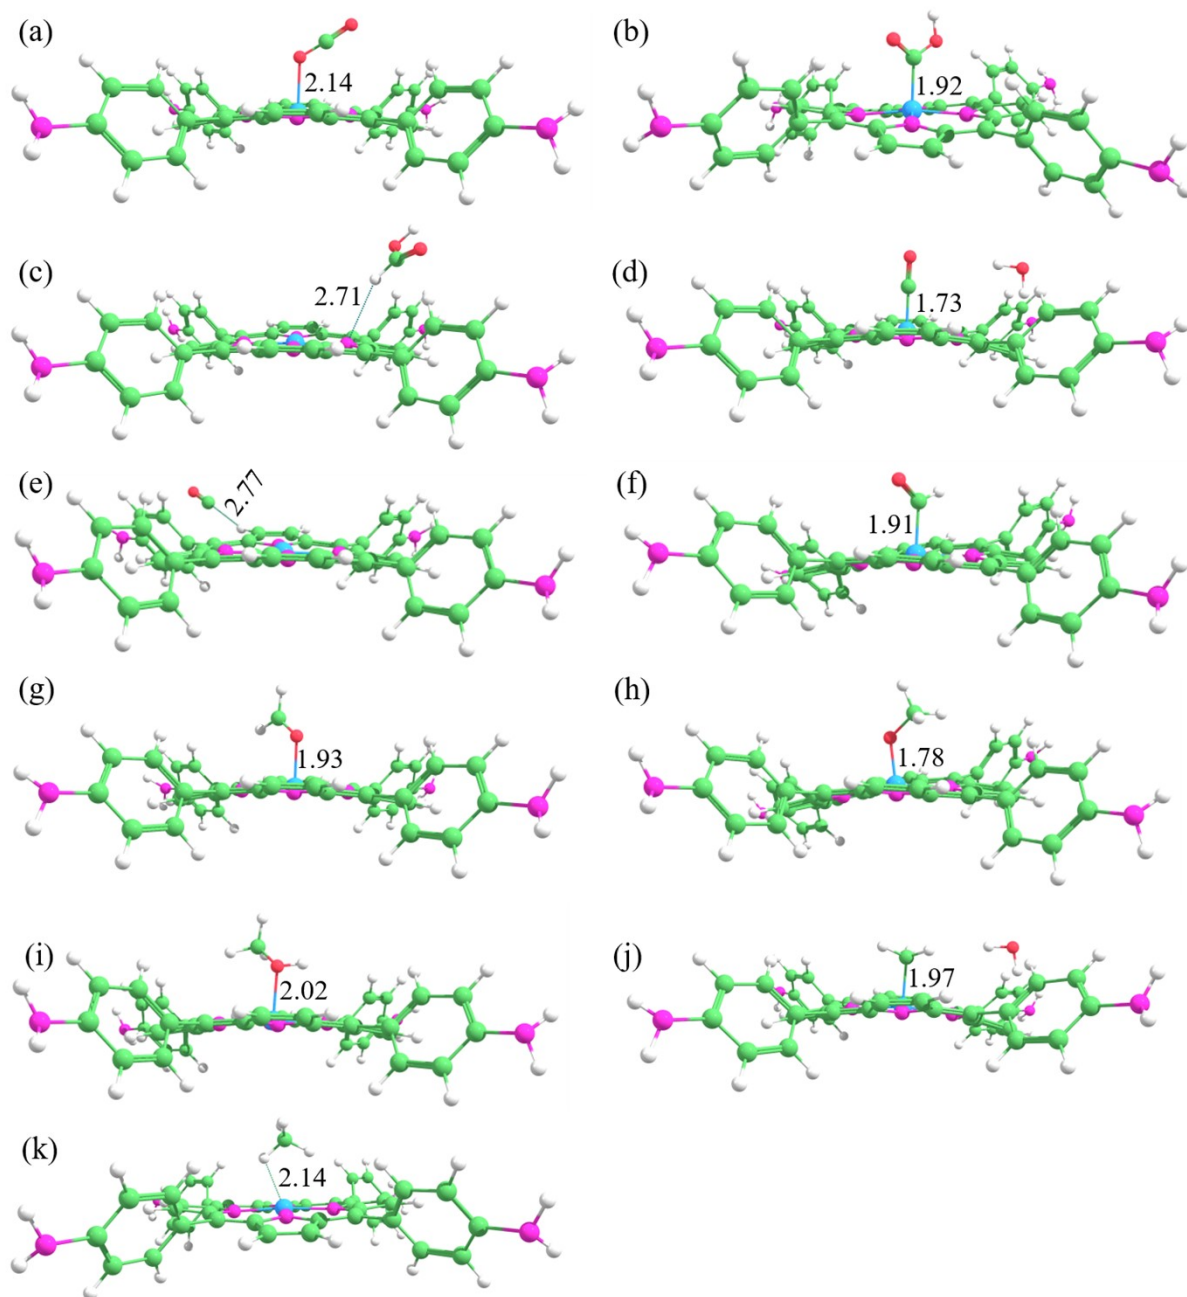

**Fig. S6.** The optimized geometries of products ( $\text{CO}_2$  reduction to  $\text{C}_1$  products): (a)  $\text{*CO}_2$ , (b)  $\text{*COOH}$ , (c)  $\text{*+HCOOH}$ , (d)  $\text{*CO+H}_2\text{O}$ , (e)  $\text{*+CO}$ , (f)  $\text{*CHO}$ , (g)  $\text{*OCH}_2$ , (h)  $\text{*OCH}_3$  (i)  $\text{*CH}_3\text{OH}$ , (j)  $\text{*CH}_3+\text{H}_2\text{O}$ , and (k)  $\text{*+CH}_4$ . The \* indicates the adsorbed on the Fe- $\text{NH}_2$ TPP surface. The unit of bond lengths are indicated in Å. The green, red, pink, white, and blue represents the carbon, oxygen, nitrogen, hydrogen atoms, and iron transition metal.



**Table S1.** Calculated electronic parameters of the investigated systems, including the HOMO-LUMO energy gap ( $E_{\text{H-L}}$  gap), ionization potential (IP), electron affinity (EA), and chemical hardness ( $\eta$ ), presented in electron volts (eV).

| <b>Structure</b>       | <b>HOMO</b> | <b>LUMO</b> | <b><math>E_{\text{H-L}}</math> gap</b> | <b>IP</b> | <b>EA</b> | <b><math>\eta</math></b> |
|------------------------|-------------|-------------|----------------------------------------|-----------|-----------|--------------------------|
| TPP                    | -4.90       | -2.21       | 2.69                                   | 4.90      | 2.21      | 1.35                     |
| Fe-TPP                 | -4.98       | -2.68       | 2.30                                   | 4.98      | 2.68      | 1.15                     |
| OHTPP                  | -4.74       | -2.12       | 2.62                                   | 4.74      | 2.12      | 1.31                     |
| Fe-OHTPP               | -4.82       | -2.59       | 2.23                                   | 4.82      | 2.59      | 1.12                     |
| NH <sub>2</sub> TPP    | -4.41       | -1.86       | 2.55                                   | 4.41      | 1.86      | 1.28                     |
| Fe-NH <sub>2</sub> TPP | -4.50       | -2.35       | 2.15                                   | 4.50      | 2.35      | 1.08                     |
